# Supplementary material for: Combining Regional Mesh Refinement With Vertically Enhanced Physics to Target Marine Stratocumulus Biases
Source: Copernicus journal article supplement (doi:10.5194/gmd-2022-175), 2022-08-17

# Low Level Cloud Amount (%)

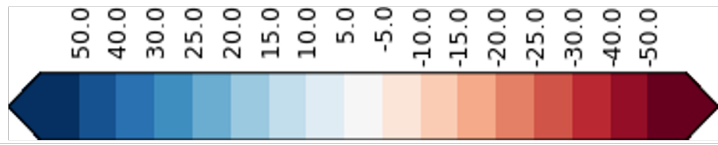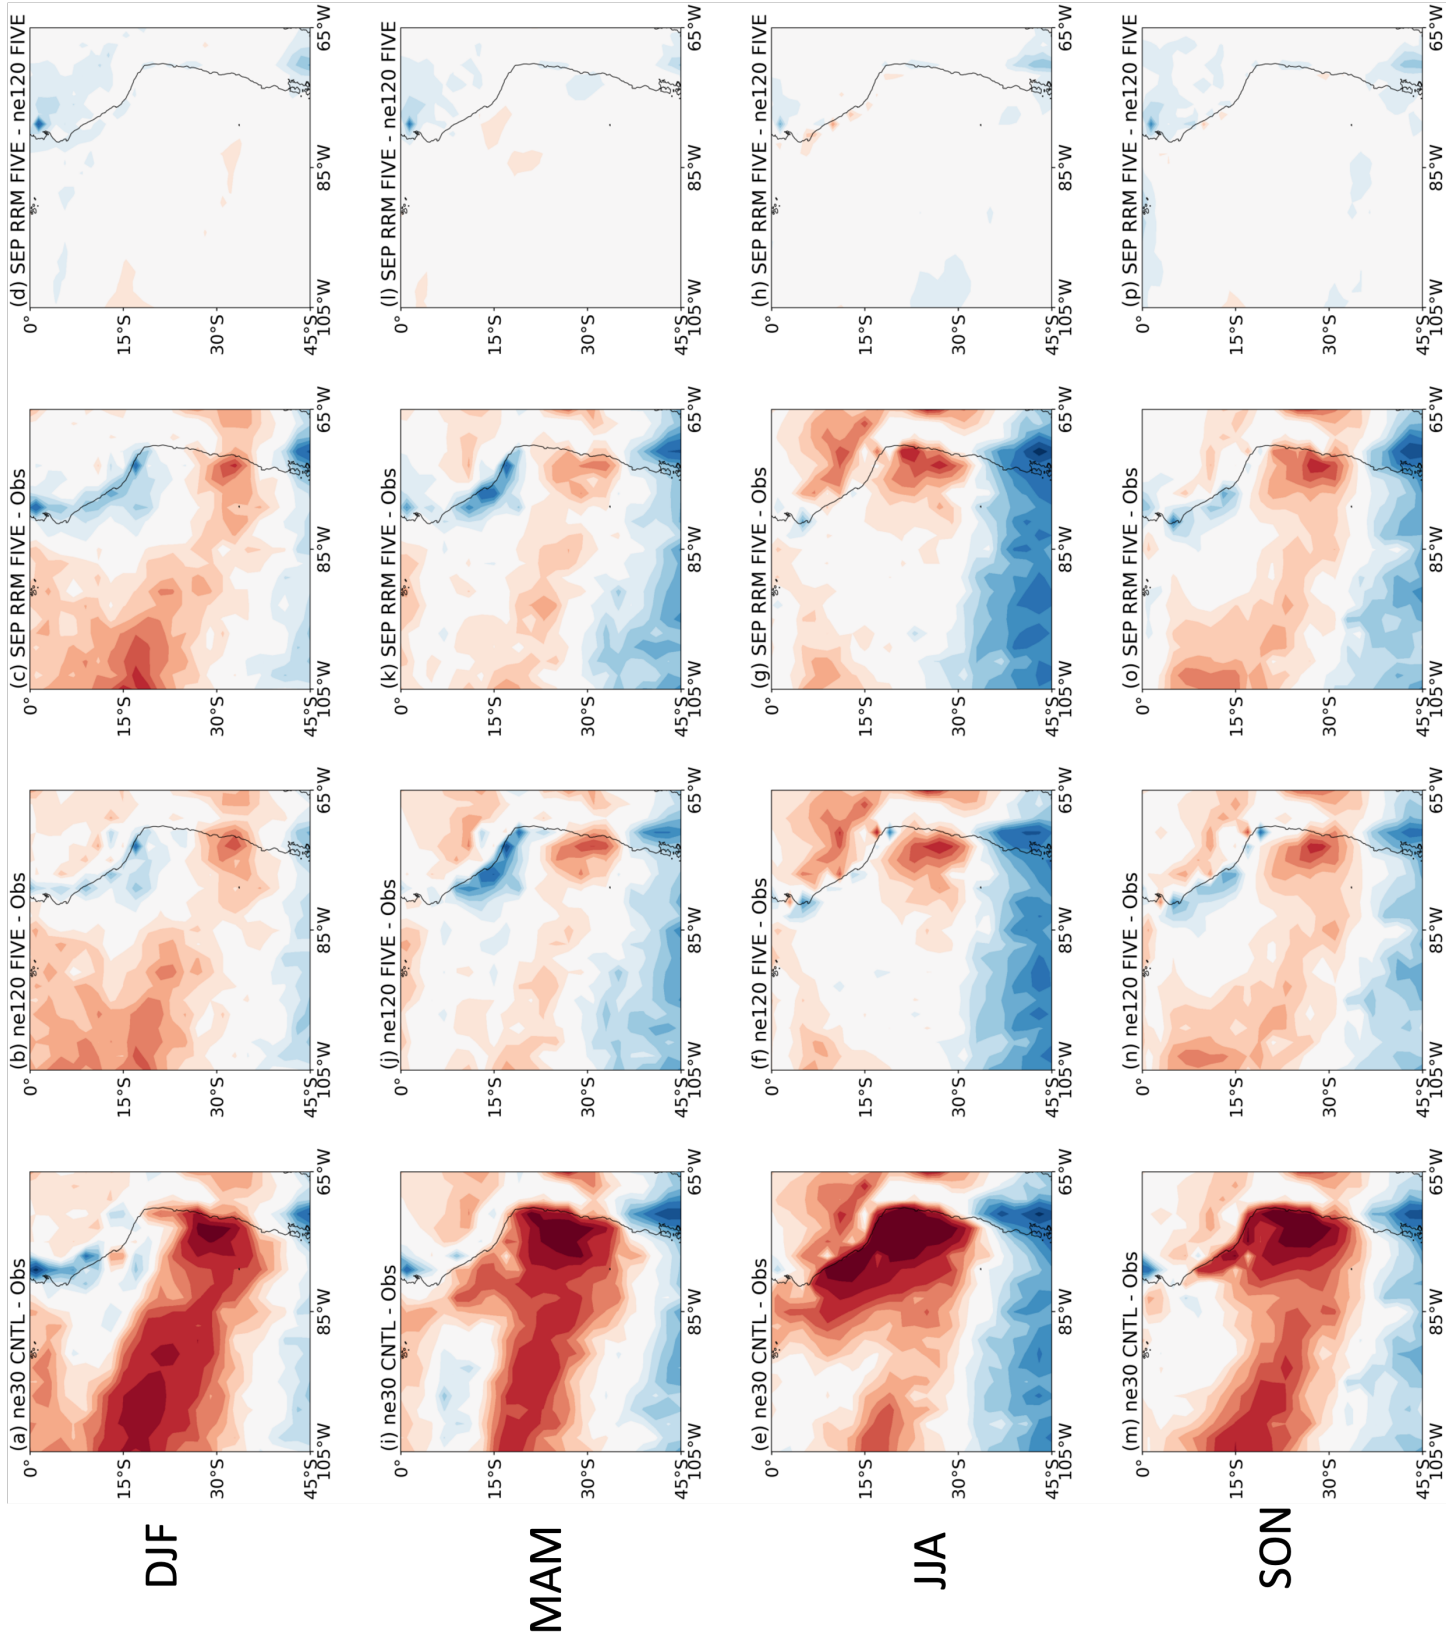

Supplement: Supplementary file [file gmd-2022-175-AC3-supplement.pdf]
